# Supplementary material for: SARS-CoV-2 Neutralizing Antibodies in Three African Countries Following Multiple Distinct Immune Challenges
Source: MDPI journal article supplement (doi:10.3390/vaccines12040363), 2024-03-27
Supplement: s1 [file s1]

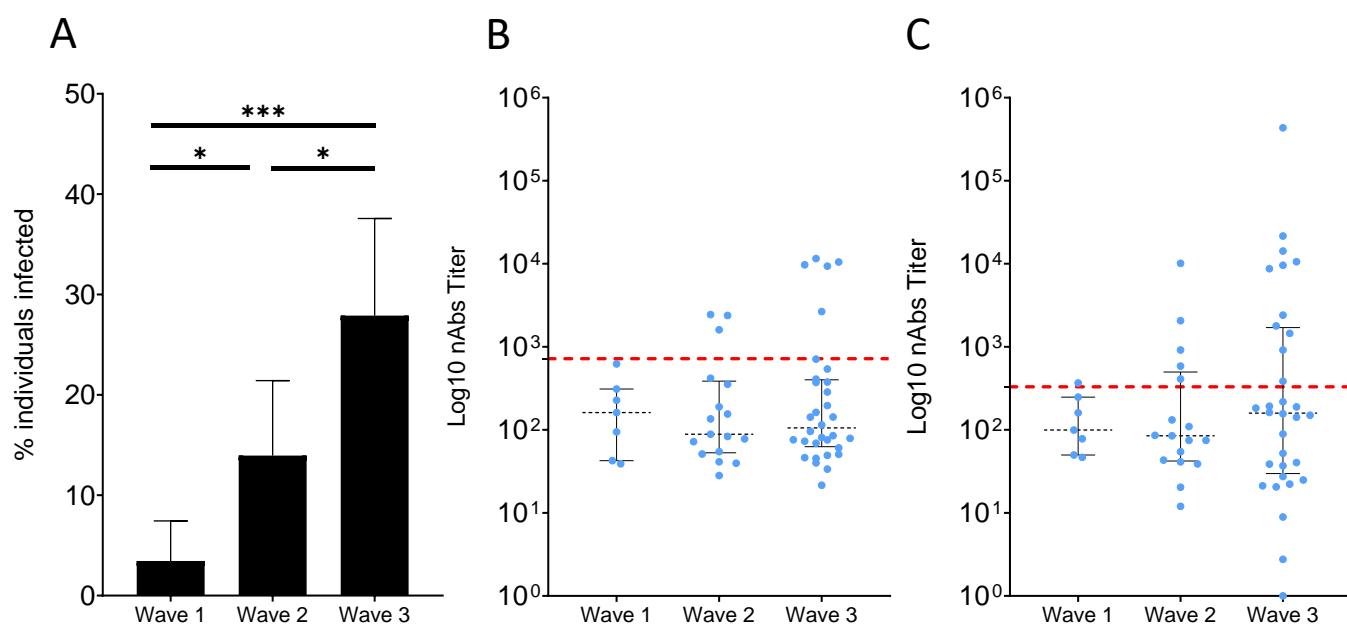

**Figure S1: nAb responses in I+V- HCWs in Madagascar according reported wave of infection.** (A) Percentage of unvaccinated HCWs who declared having been infected only once: during waves 1, 2 and 3. (B-C) SARS-CoV-2 specific nAb titers according to the declared wave of infection in individuals infected just once. (B) against W, (C) against BA.2. \*  $p$ -value <0.05; \*\*\*  $p$ -value <0.0001, ns: non significant

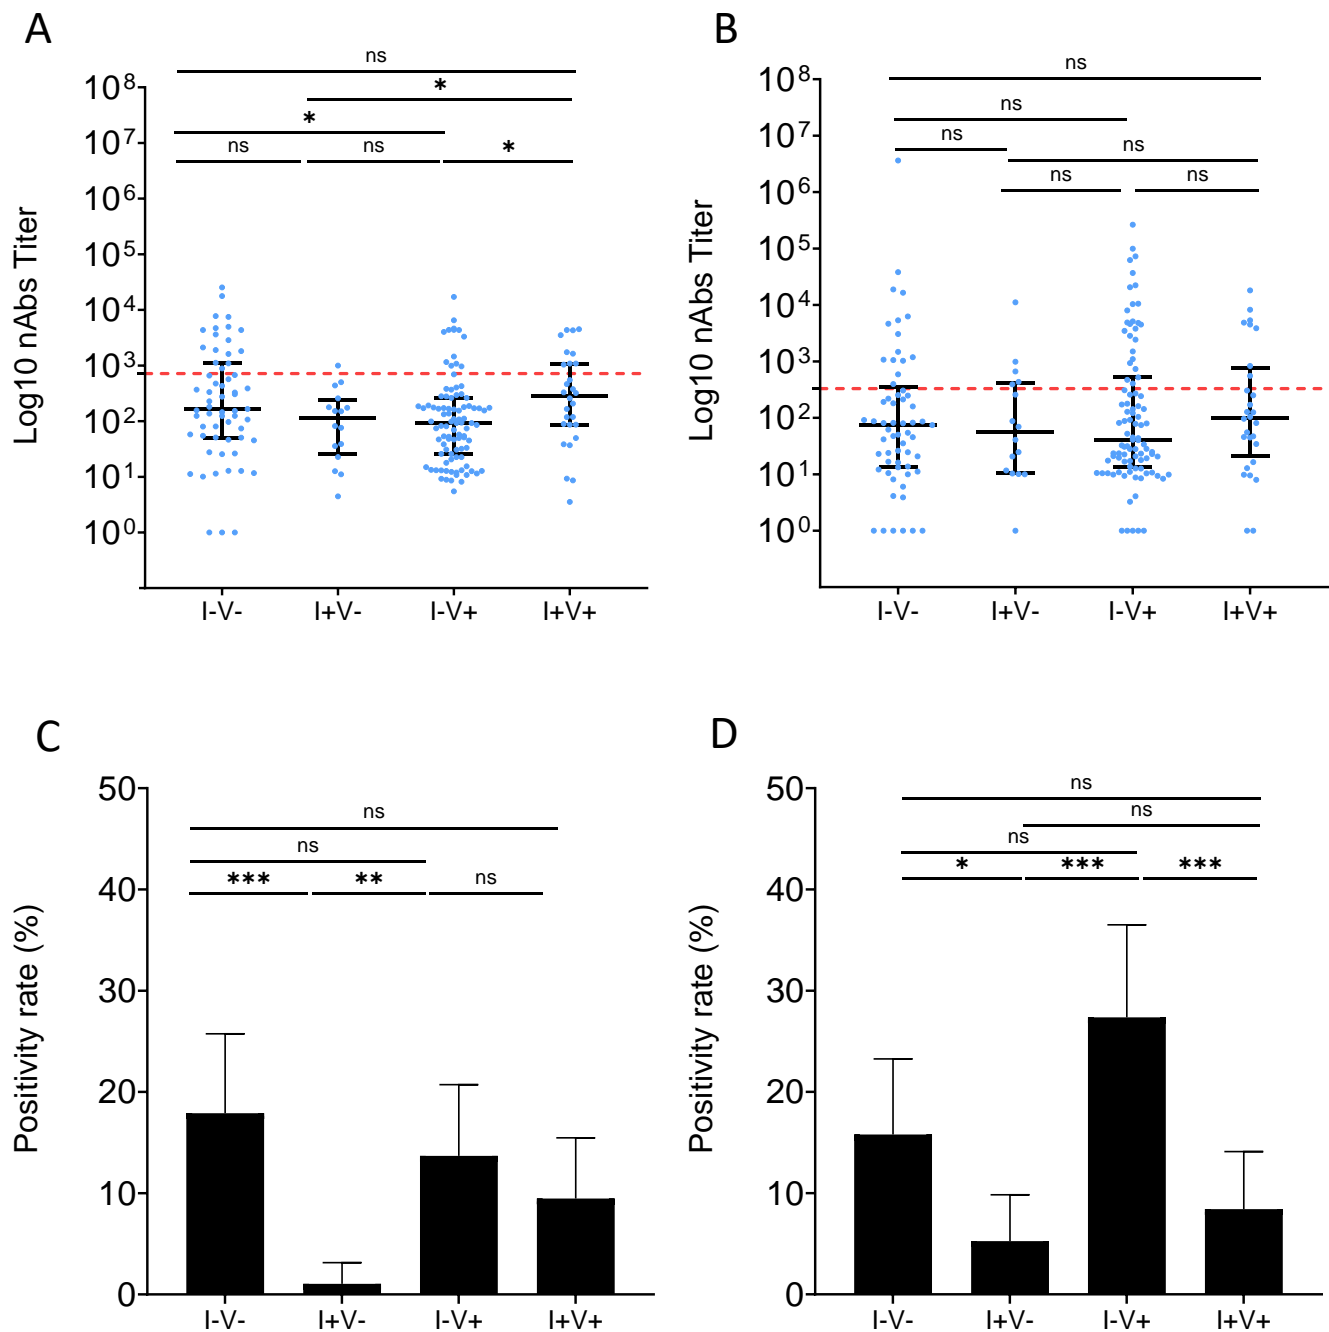

**Figure S2: Neutralizing antibody responses in the Cameroonian HCW sub-populations.** (A-B) SARS-CoV-2 specific nAb titers according to the type of immunization. (A) against WT, (B) against BA.2. populational groups are indicated on the X axis and neutralization titers on the Y axis. Data were compared using the Mann-Whitney test. Each dot represents an independent sample. (C-D) Percentage of individuals having nAb titers above the calculated threshold. (C) against WT, (D) against BA.2. Data were compared using the Fischer's exact test. \* *p*-value <0.05 ; \*\* *p*-value <0.001; \*\*\* *p*-value <0.0001; ns: non significative

| Vaccines        |       | Madagascar n(%) | RCA n(%)    | Cameroon n(%) |
|-----------------|-------|-----------------|-------------|---------------|
| ASTRAZENECA     | Dose1 | 131(39,82%)     | 82 (70,69%) | 7 (5,69%)     |
|                 | Dose2 | 117(35,56%)     | 3 (50%)     |               |
|                 | Dose3 | 4(1,22%)        |             |               |
| Johnson&Johnson | Dose1 | 176(53,5%)      | 30 (25,86%) | 85 (69,10%)   |
|                 | Dose2 | 7(2,13%)        | 5 (83,33%)  | 2 (1,63%)     |
|                 | Dose3 | 2(0,61%)        |             |               |
| SINOPHARM       | Dose1 | 1(0,3%)         | 2 (1,72%)   | 29 (23,57%)   |
|                 | Dose2 | 1(0,3%)         |             |               |
|                 | Dose3 |                 |             |               |
| Sinovac         | Dose1 | 1(0,3%)         |             |               |
|                 | Dose2 |                 |             |               |
|                 | Dose3 |                 |             |               |
| Moderna         | Dose1 | 1(0,3%)         |             |               |
|                 | Dose2 | 2(0,61%)        |             |               |
|                 | Dose3 | 1(0,3%)         |             |               |
| Pfizer/BioNTech | Dose1 | 19(5,78%)       |             |               |
|                 | Dose2 | 28(8,51%)       |             |               |
|                 | Dose3 | 43(13,07%)      |             |               |
| Spoutnik V      | Dose1 |                 |             |               |
|                 | Dose2 | 1(0,3%)         |             |               |
|                 | Dose3 |                 |             |               |
| Unknow          | Dose1 |                 | 2 (1,72%)   | 2 (1,62%)     |
|                 | Dose2 |                 | 1 (16,66%)  |               |
|                 | Dose3 |                 |             |               |

**Table S1:** . Descriptive table of vaccines received during the study. The percentage corresponds to the number of individuals among the vaccinated individuals who received a type of vaccine (Dose 1: first vaccination, Dose 2: Second vaccination, Dose 3: Third vaccination).
